1

2

3

4 A spectacular anomaly in the 4-mer composition of the giant pandoravirus genomes

5 reveals a stringent new evolutionary selection process

6

7 Running title: Unique compositional anomaly in pandoraviruses

8

9 Olivier Poirot<sup>a#</sup>, Sandra Jeudy<sup>a</sup>, Chantal Abergel<sup>a</sup>, Jean-Michel Claverie<sup>a#</sup>

10 <sup>a</sup> Aix Marseille Univ., CNRS, IGS, Information Génomique & Structurale (UMR7256),

11 Institut de Microbiologie de la Méditerranée (FR 3489), Marseille, France

12

13 # Correspondance to : [jean-michel.claverie@univ-amu.fr](mailto:jean-michel.claverie@univ-amu.fr) ; [olivier.poirot@igs.cnrs-mrs.fr](mailto:olivier.poirot@igs.cnrs-mrs.fr)

14

15

16 **Keywords:** Chaos Game Representation; Pandoravirus; Giant viruses; 4-mer statistics;

17 Genome composition; DNA editing; Host-virus relationship .

18

## 19 **Abstract**

20 The Pandoraviridae is a rapidly growing family of giant viruses, all of which have been  
21 isolated using laboratory strains of Acanthamoeba. The genomes of ten distinct strains  
22 have been fully characterized, reaching up to 2.5 Mb in size. These double-stranded DNA  
23 genomes encode the largest of all known viral proteomes and are propagated in oblate  
24 virions that are among the largest ever-described (1.2  $\mu\text{m}$  long and 0.5  $\mu\text{m}$  wide). The  
25 evolutionary origin of these atypical viruses is the object of numerous speculations.  
26 Applying the Chaos Game Representation to the pandoravirus genome sequences, we  
27 discovered that the tetranucleotide (4-mer) “AGCT” is totally absent from the genomes of  
28 2 strains (*P. dulcis* and *P. quercus*) and strongly underrepresented in others. Given the  
29 amazingly low probability of such an observation in the corresponding randomized  
30 sequences, we investigated its biological significance through a comprehensive study of  
31 the 4-mer compositions of all viral genomes. Our results indicate that “AGCT” was  
32 specifically eliminated during the evolution of the Pandoraviridae and that none of the  
33 previously proposed host-virus antagonistic relationships could explain this phenomenon.  
34 Unlike the three other families of giant viruses (Mimiviridae, Pithoviridae, Molliviridae)  
35 infecting the same Acanthamoeba host, the pandoraviruses exhibit a puzzling genomic  
36 anomaly suggesting a highly specific DNA editing in response to a new kind of strong  
37 evolutionary pressure.

## 38 **Importance**

39 The recent years have seen the discovery of several families of giant DNA viruses all  
40 infecting the ubiquitous amoebozoa of the genus Acanthamoeba. With dsDNA genomes  
41 reaching 2.5 Mb in length packaged in oblate particles the size of a bacterium, the

42 pandoraviruses are the most complex and largest viruses known as of today. In addition to  
43 their spectacular dimensions, the pandoraviruses encode the largest proportion of proteins  
44 without homolog in other organisms, thought to result from a *de novo* gene creation  
45 process. While using comparative genomics to investigate the evolutionary forces  
46 responsible for the emergence of such an unusual giant virus family, we discovered a  
47 unique bias in the tetranucleotide composition of the pandoravirus genomes that can only  
48 result from an undescribed evolutionary process not encountered in any other  
49 microorganism.

## 50 Introduction

51 The Pandoraviruses are among the growing number of families of environmental  
52 giant DNA viruses infecting protozoans and isolated using the laboratory host  
53 *Acanthamoeba* (Protozoa/Lobosa/Ameobida/ *Acanthamoebidae*/ *Acanthamoeba*)<sup>1-4</sup>. As of  
54 today, they exhibit the largest fully characterized viral genomes, made of linear dsDNA  
55 molecules from 1.9 to 2.5 Mb in size, predicted to encode up to 2500 proteins<sup>1-3</sup>. After their  
56 internalization by phagocytosis, these viruses multiply in their amoebal host through a lytic  
57 cycle lasting about 12 hours, ending with the production of hundreds of giant amphora-  
58 shaped particles (1.2  $\mu\text{m}$  long and 0.5  $\mu\text{m}$  wide)<sup>1-3</sup>. The phylogenetic structure of the  
59 Pandoraviridae family exhibits two separate clusters referred to as A- and B- clades<sup>2,3</sup> (Fig.  
60 1). Despite this clear phylogenetic signal (computed using a core set of 455 orthologous  
61 proteins), strains belonging to clade A or B did not exhibit noticeable differences in terms  
62 of virion morphology, infectious cycle, host range, or global genome structure and  
63 statistics<sup>1-3</sup>.

64 In addition to their unusual virion morphology and gigantic genomes, the pandoraviruses  
65 exhibit other unique features such as an unmatched proportion (>90%) of genes coding  
66 for proteins without any database homologs (ORFans) outside of the Pandoraviridae family,  
67 and strain-specific genes contributing to an unlimited pan-genome<sup>1-3</sup>. These features,  
68 confirmed by the analysis of additional strains<sup>5</sup>, led us to suggest that a process of *de novo*  
69 and *in situ* gene creation might be at work in pandoraviruses<sup>2, 3</sup>. Following this history of  
70 unexpected findings, we thought that further analyses of the Pandoraviridae might reveal  
71 additional surprises.

72 While searching for hidden genomic patterns eventually linked to evolutionary processes  
73 unique to the pandoraviruses, we used a Chaos Game graphical representation of their  
74 genome sequences<sup>6-7</sup>. This method converts long one-dimensional DNA sequence into a  
75 fractal-like image, through which a human observer may detect specific patterns. This  
76 representation illustrates in a holistic manner the frequencies of all oligonucleotides of  
77 arbitrary length  $k$  ( $k$ -mers) in a given DNA sequence. Using this approach led us to discover  
78 that the 4-mer “AGCT” was uniquely absent from the genome of *Pandoravirus dulcis*,  
79 providing the starting point of the present study.

80

## 81 **Results**

### 82 ***The absence of any given 4-mer in a long random DNA sequence is highly improbable***

83 After detecting the absence of the “AGCT” word in the Chaos Game graphical  
84 representation of the *P. dulcis* genome, we computed the number of occurrence of all 4-  
85 mers in the ten available Pandoravirus genome sequences using direct counting<sup>8</sup>. This  
86 revealed that “AGCT” was also absent from the genome of *P. quercus*. Notice that although  
87 these strains belong to the same A-clade, their genome sequences are nevertheless far  
88 from identical (their orthologous proteins share 72% identical residues in average), hence  
89 the common missing “AGCT” is not a mere consequence of their sequence similarity.

90 Such a plain finding might not sound very interesting, until one realize that not  
91 encountering a single occurrence of “AGCT” in DNA sequences respectively 1.908.524 bp  
92 (*P. dulcis*) and 2.077.288 bp (*P. quercus*) is amazingly unlikely, as shown below, using  
93 increasingly sophisticated computations.

94 In the simplest case, let us first consider a random DNA sequence with equal proportions  
95 of the four nucleotides (%A=%T=%C=%G=25%). Since there are 256 distinct 4-mers, the  
96 probability for each of them to occur at a given position in an increasingly long sequence  
97 tends to  $p_{AGCT} = 1/256$ . In a random sequence of approximately 2 Mbp, one thus expects  
98 an average of about 7800 occurrences for each distinct 4-mers. This already suggests how  
99 unlikely it is for one of them to be absent.

100 To estimate the order of magnitude of such probability, the DNA sequence is seen as  
101 consisting of 4 sets of non-overlapping 4-mers collected according to 4 different “reading  
102 frames” (e.g. 4-mers 1-4, 5-8, 9-12, ..., etc, for frame 1). The different reading frames thus  
103 correspond to approximately 500,000 positions each.

104 At each of these position, the probability for “AGCT” not to occur is  $q_{AGCT} = 255/256$ . For  
105 one reading frame, this probability becomes approximately

$$106 \quad Q_{AGCT} = \left(255/256\right)^{500,000} \cong 1.2 \cdot 10^{-850} \quad (1)$$

107 and:

$$108 \quad 4 \times Q_{AGCT} \cong 5 \cdot 10^{-850} \quad (2)$$

109 for the 4 reading frames (assuming them to be independent for the sake of simplicity).

110 Such a value is smaller than any that could be computed in reference to a physical process.

111 For instance, one second approximately corresponds to  $2 \cdot 10^{-18}$  of the age of the universe.

112 The above probability should actually be corrected to account for the fact that we did not  
113 specifically search for “AGCT” while analyzing the viral genome. Any missing 4-mer would  
114 have raised the same interest. A Bonferroni correction should then be applied to

115 compensate for the multiple testing of 256 different 4-mers. However, the probability of  
116 not finding any 4-mer,  $Q_{any}$ , remains an incommensurably small number.

$$117 \quad Q_{any} \cong 256 \times 5 \cdot 10^{-850} \cong 1.3 \cdot 10^{-847} \quad (3)$$

118 We may further argue that this event was bound to occur in at least one genome given the  
119 huge amount of DNA sequence that is now available, for instance in Genbank. The  
120 calculation runs as follows; The april 2019 release of Genbank contains about  $3.2 \cdot 10^{11}$ bp.  
121 Assuming that all Genbank entries are 2 Mb-long sequences, this would correspond to 1.6  
122  $10^5$  theoretical pandoravirus genomes. The order of magnitude of the probability of  
123 observing one of them missing any of the 4-mers remains amazingly small at about

$$124 \quad Q_{any/Genbank} \cong 1.6 \cdot 10^5 \times Q_{any} \cong 2.1 \cdot 10^{-842} \quad (4)$$

125 Finally, one may want to make a final adjustment by taking into account that the *P. dulcis*  
126 genome is 64% G+C rich. This slightly change the probability of random occurrence of  
127 “AGCT” from  $p_{AGCT} = 1/256 = 0.00391$  to

$$128 \quad p_{AGCT} = (0.18)^2 \times (0.32)^2 = 3.31 \cdot 10^{-3} \quad (5)$$

129 then

$$130 \quad 4 \times Q_{AGCT} = (1 - p_{AGCT})^{500,000} \cong 8.9 \cdot 10^{-719} \quad (6)$$

131 Using the same Bonferroni correction as above lead to the final conservative estimate:

$$132 \quad Q_{any/Genbank} < 4 \cdot 10^{-711} \quad (7)$$

133 still an incommensurably small probability (e.g. the same as not getting a single head in  
134 2360 tosses of a fair coin).

135 As the above computation remains an approximation (neglecting the overlap of  
136 neighboring 4-mers), we estimated how unlikely it is that any 4-mer would be missing from  
137 large DNA sequences by a different approach. We computer generated a large number of  
138 random sequences of increasing sizes and recorded the threshold at which point none of  
139 the 4-mers is missing. Fig. 2 displays the results of such computer experiment. It shows how  
140 fast the probability of any 4-mer missing is decreasing with the random sequence size. In  
141 this experiment, we found that the proportion of sequences larger than 10,000 bp missing  
142 anyone of the 256 4-mers was less than 1/10,000.

143

#### 144 ***Caveat: randomized sequences exhibit strongly unnatural 4-mer distributions***

145 The above sections already suggested that it is impossible for the *P. dulcis* and *P.*  
146 *quercus* genomes to be missing “AGCT” solely by chance without invoking a biological  
147 constraint. However, this conclusion rests on the assumption that the randomization  
148 process suitably modeled these genomes. However, a comparison of the frequency  
149 distribution of the various 4-mers found in the actual *P. dulcis* genome (and of other  
150 pandoraviruses) with that in its randomized sequence shows spectacular differences (Fig.  
151 3). While the natural sequence consist of 4-mers occurring at frequencies distributed along  
152 a large and rather continuous interval, the randomized sequence exhibits 4-mers occurring  
153 around 5 narrow peaks of frequencies with none in between. As expected from a good  
154 quality randomization, these peaks corresponds to the frequencies of the five types of 4-  
155 mers: those consisting of only A or T at the lower end, those consisting of only G or C at the  
156 higher end, and those consisting of (A or T)/(G or C) in proportions 1/3, 2/2, and 3,1 in  
157 between. The more continuous and spread out natural distribution is the testimony of



158 multiple evolutionary constraints, most of them unknown, that have resulted in a distinct  
159 4-mer usage, like a dialect or a language tic inherited from past generations<sup>9</sup>.

160 First, notice that the missing “AGCT” does not correspond to the 4-mer type with the  
161 lowest expected frequency (but the middle one). Second, it is clear that the above  
162 probability calculations based on such distorted model of the natural sequence, cannot  
163 be used as a reliable estimate of statistical significance. This problem is similar to the one  
164 encountered when trying to evaluate the quality of local sequence alignments in similarity  
165 searches<sup>10, 11</sup>.

166 We can mitigate the effect of the above stringent randomization (only preserving the  
167 original nucleotide composition) by using the *P. dulcis* and *P. quercus* actual genome  
168 sequences to evaluate to what extent the absence of “AGCT” might be the mere statistical  
169 consequence of the frequency of its constituent 3-mers: AGC and GCT.

170 As shown in Table 1, AGC and GCT are not among the least frequent 3-mers found in the *P.*  
171 *dulcis* or *P. quercus* genomes. As the theoretical average is 1/64 ( $\approx 0.0156$ ), their  
172 proportions range from 0.0156 to 0.0097 within the coding and non-coding regions of the  
173 genomes. On one given strand, AGC and GCT also do not strongly segregate from each  
174 other’s in coding *versus* intergenic regions (Table 1). By combining the AGC 3-mer  
175 frequency with that of the single nucleotide T ( $p_{(t)}=0.182$  for *P. dulcis*,  $p_{(t)}=0.196$  for *P.*  
176 *quercus*), the expected number of “AGCT” per strand is 4286 for *P. dulcis* and 4898 for *P.*  
177 *quercus*, while none is observed. Such stark contrast between expected and observed  
178 values is unique to the “AGCT” 4-mer. By comparison, the palindromic “ACGT” 4-mer (with  
179 an identical composition) exhibits a statistical behavior (Table 1, grey bottom lines) much  
180 closer to the 3-mer-dependent random sequence model.

181

182 ***No 4-mer is missing from the largest actual viral genomes***

183 As vividly illustrated in Fig. 3, the 4-mer distributions in randomized sequences  
184 strongly depart from that in natural genomes. We thus analyzed all complete genome  
185 sequences available in the viral section of Genbank<sup>12</sup>, to investigate to what extent the  
186 absence of a given 4-mer was exceptional for genomes in the size range corresponding to  
187 Pandoraviruses.

188 We found that the next largest viral genomes missing a 4-mers were those of five phages  
189 infecting enterobacteria, with unusual genome sizes in the 345kb-359kb range<sup>13-16</sup>. Except  
190 for *P. dulcis* and *P. quercus*, none of the 26 largest publicly available viral genomes  
191 (including 25 large/giant eukaryotic viruses, and phage G)<sup>12</sup> were missing a 4-mer (Fig. 4).  
192 Thus, even by comparison with natural sequences, *P. dulcis* and *P. quercus* appear truly  
193 exceptional.

194 We noticed that the five large enterobacteria-infecting phages pointed out by our analysis,  
195 were all missing the same “GCGC” 4<sub>mer</sub> although they exhibit divergent genomic  
196 sequences and were isolated from different hosts<sup>13-16</sup>. This palindromic 4-mer might be the  
197 target of isoschizomeric restriction endonucleases functionally homologous to HhaI found  
198 in *Haemophilus haemolyticus*, a Gammaproteobacteria. Many of them have been  
199 described (see <https://enzymefinder.neb.com>). We will return to the hypothesis that some  
200 4-mers might be missing in response to a host or viral defense mechanism<sup>17</sup> in the  
201 discussion section.

202

203 **The anomalous distribution of “AGCT” correlates with the Pandoraviridae phylogenetic**  
204 **structure**

205 The absence of “AGCT” in *P. dulcis* and *P. quercus* genomes becomes even more  
206 intriguing when put in the context of the phylogenetic structure of the whole pandoravirus  
207 family. As shown in Fig. 1, the Pandoraviridae neatly cluster into two separate clades. For  
208 well-conserved proteins (such as the DNA polB), the percentage of identical residues  
209 between intra-clade orthologs is in the 82% to 90% range, and in the 72% to 76% range  
210 between the two clades. The corresponding genome sequences are thus far from being  
211 identical (and only partially collinear) within each clade. It is thus quite remarkable that the  
212 “AGCT” count exhibits a consistent trends to be very low in A-clade members, and at least  
213 10 times higher in B-clade strains. Such a contrast was strong enough to pre-classify three  
214 unpublished isolates prior complete genome assembly and finishing (data not shown).

215 The large difference in “AGCT” counts could be eventually due to the deletion of a genomic  
216 region concentrating most of them, for instance within a repeated structure absent from  
217 the A-clade isolates. However, Fig. 5 shows that this is not at all the case. In B- clade isolates,  
218 the numerous occurrences of “AGCT” are rather uniformly distributed along the whole  
219 genomes. However, we noticed that the “AGCT” distribution in the *P. neocaledonia*  
220 genome exhibits a change of slope at one of its extremity, as if the corresponding segment  
221 had been acquired from a A-clade strain. Such hypothesis was confirmed using a dot-plot  
222 comparison with the *P. salinus* genome, to which this terminal segment is clearly  
223 homologous (Fig. 6).

224

225 **“AGCT” was specifically deleted from A-clade pandoravirus genomes**

226 We have seen in the previous section that the extreme difference in the “AGCT”  
227 count in *P. dulcis* (N=0) and *P. neocaledonia* (N=544) is not due to the local deletion of an  
228 “AGCT”-rich segment. We then investigated if that difference was limited to “AGCT”, or if  
229 other 4-mers exhibited large differences in counts. Fig. 7 shows that this was not the case.  
230 If the frequencies of the various 4-mers within each genome exhibit tremendous  
231 differences (very much at odd with their distribution in randomized sequences, see Fig. 3),  
232 the frequency for each 4-mer (low, average or high) was very similar across the two  
233 different viral genomes (Spearman correlation,  $r=0.9859$ ). The difference in “AGCT” count  
234 is thus not the consequence of the use of globally distinct 4-mer vocabularies by the two  
235 pandoravirus clades. It appears to be due to a selection specifically exerted against the  
236 presence of “AGCT” in the genomes of A-clade pandoraviruses.

237 Another argument in favor of an active selection against the presence of “AGCT” is provided  
238 by the following statistical computation. We first identified the orthologous proteins in *P.*  
239 *dulcis* and *P. neocaledonia*, using the best-reciprocal Blastp match criterium. We identified  
240 585 orthologous ORFs. In *P. neocaledonia*, 180 of them were found to contain one or  
241 several “AGCT” (for a total of 350 occurrences). We then computed the average percentage  
242 of nucleotide identity in the alignments of these 180 *P. neocaledonia* ORFs with their *P.*  
243 *dulcis* orthologous counterparts. The value was 69%.

244 According to a neutral scenario (and neglecting multiple hits), the probability is thus  $p =$   
245  $0.69$  that any nucleotide remains the same along the evolutionary trajectory separating the  
246 two pandoraviruses. For a given “AGCT”, the probability to remain intact over the same  
247 evolutionary distance is  $p_{intact} = 0.69^4 = 0.227$ , such as none of the four positions is  
248 changed. For the sake of simplicity, we will neglect the chance creation of new “AGCT”

249 during the process. As a result, we then expect *P. dulcis* orthologous ORFs to exhibit 68  
250 occurrences (i.e.  $0.227 \times 350$ ) of “AGCT”.

251 This simple calculation already indicates that the “AGCT” 4-mer diverged much faster (at  
252 least 80 times faster since  $350 \times 0.227 / 80 < 1$ ) than the rest of the orthologous coding  
253 regions. This result suggests that the absence of “AGCT” in *P. dulcis* and *P. quercus*, as well  
254 as its distinctive low frequency in all A-clade strains is the consequence of an active counter  
255 selection. We discuss possible molecular mechanisms in the following section. The above  
256 calculation could not be extended to interORFs regions, due to their much lower  
257 conservation and their unreliable pairwise alignments.

258

## 259 **Discussion**

### 260 **Which model for the counter selection of “AGCT”?**

261 Following our statistical computations on random sequences confirmed by the  
262 analysis of actual genome sequences, we can safely assume that the genome of the  
263 common ancestor of the A- and B-clade pandoraviruses was not missing any 4-mers. Our  
264 discussion will thus take for granted that the difference in “AGCT” frequency between the  
265 two Pandoraviridae clades is the consequence of a loss in the A-clade rather than a gain in  
266 the B-clade.

267 Any model proposed to explain our results must also take into account that the two types  
268 of pandoraviruses are infecting and replicating in the very same *Acanthamoeba* host. The  
269 cause of the marked difference in “AGCT” counts between the two clades (such as a  
270 protective mechanism) must thus reside within the viruses themselves. Such inference is

271 further supported by the fact that we found that none of the other families of giant  
272 viruses<sup>18</sup> infecting the very same *Acanthamoeba* host exhibited a similar 4-mer anomaly in  
273 their genome composition.

274 The first model that comes to mind is inspired from the well-documented restriction-  
275 modification systems that many bacteria use to counteract bacteriophage infections. The  
276 host bacterial cells express DNA sites (most often short palindromes) specific  
277 endonucleases that cut the invading phage genome before it could replicate. Such defense  
278 mechanism imposes the bacteria to protect the cognate motif in its own genome using a  
279 specific methylase. According to the Red Queen evolutionary concept, the bacteriophages  
280 could counteract the host's defense by removing the targeted site from their own  
281 genome<sup>17</sup>. The absence of the palindrome "GCGC" that we previously noticed in several  
282 large enterobacterial phages<sup>13-16</sup> could result from such evolutionary strategy.

283 Translating such a model in our system thus requires three distinct assumptions: 1) that  
284 the *Acanthamoeba* cells express an antiviral endonuclease specific for "AGCT"; 2) that B-  
285 clade pandoraviruses are immune from it (as other *Acanthamoeba*-infecting viruses); 3)  
286 that A-clade pandoraviruses evolved a different strategy by removing the endonuclease  
287 target from their genomes.

288 Such a model was readily invalidated by simply attempting to digest the B-clade *P.*  
289 *neocaledonia* genomic DNA (extracted from infectious particles) with commercial  
290 restriction enzymes (such as PvuII) targeting "cAGCTg" (212 occurrences) and AluI,  
291 targeting "AGCT" (544 occurrences). The resulting Pulsed-field gel electrophoresis (PFGE)  
292 pattern showed that these sites were not protected (Supplementary Fig.S1). Accordingly,

293 the PacBio data used to sequence the *P. neocaledonia* genome<sup>2</sup> did not indicate the  
294 presence of modified nucleotides at the “AGCT” sites<sup>19</sup>.

295 We must point out that the above results simultaneously invalidate a symmetrical model  
296 where the “AGCT”-specific endonuclease would have been encoded by the pandoraviruses,  
297 together with the protective cognate methylase. Such a hijacked restriction/modification  
298 system would have been attractive as it is found in chloroviruses<sup>20</sup>, another family of large  
299 eukaryotic DNA viruses. Unfortunately, it does not apply here. Accordingly, no homolog of  
300 the cognate DNA-methyl transferase was detected among the *P. neocaledonia* or *P.*  
301 *macledensis* protein-coding gene contents. Further nailing the coffin of such  
302 restriction/modification hypothetical model, no difference in terms of potentially relevant  
303 endonuclease or DNA methylase was found between the gene contents of the A-clade *P.*  
304 *dulcis* and *P. quercus* and those of the B-clade *P. neocaledonia* and *P. macledensis*.

305 A more hypothetical model would assume that the “AGCT” motif is targeted at the  
306 transcript level (i.e. “AGCU”) rather than at the DNA level. Classical endonucleases and DNA  
307 methylases would thus not be involved in the host-virus confrontation. Several arguments  
308 are pleading against a mechanism directly targeting viral transcripts.

309 First, as B-clade pandoraviruses exhibit similar proportions of “AGCT” in ORFs and inter-  
310 ORF regions, the A-clade strains would have had no incentive to eliminate the motif from  
311 their intergenic regions, as *P. dulcis* and *P. quercus* have done totally in reaching zero  
312 occurrences. “AGCT” is also still present in some protein-coding regions of *P. inopinatum*  
313 (N=15), *P. salinus* (N=3), and *P. celtis* (N=1).

314 Second, very few motif-specific RNAses are known, and to our knowledge, only one is viral:  
315 a protein encoded in the bacteriophage T4 RegB gene<sup>21</sup>. We found no significant homolog

316 of this protein in the pandoraviruses or *Acanthamoeba*. We also looked for mRNA  
317 methylases that could act as a protective mechanism for the viral transcript. A single one  
318 was described in another family of eukaryotic DNA virus: the product of the Megavirus  
319 Mg18 gene<sup>22</sup>. Again, no significant homolog of this protein was detected in the  
320 pandoraviruses.

321 In conclusion to this section, if the presence of “AGCT” is decreasing the virus fitness, we  
322 found no evidence that it is due to a DNA or RNA nuclease-mediated defense mechanism.  
323 However, it could still be due to an unknown inhibitory mechanism acting at the  
324 transcription regulation level to which B-clade pandoviruses would exhibit some immunity.  
325 The corresponding proteins could be encoded among the numerous ORFans found in  
326 pandoravirus genomes<sup>1-3</sup>.

327 Finally, could “AGCT” be deleterious for some intrinsic reasons, for instance due to its  
328 palindromic structure and composition? This is very unlikely, when one compare the absent  
329 “AGCT” in *P. dulcis* and *P. quercus*, with other 4-mers with identical structures and  
330 compositions. For instance “ACGT” occurs at 5822 and 6165 positions (in *P. dulcis* and *P.*  
331 *quercus*, respectively), and “GATC” occurs at 8114 and 8567 times) in (*P. dulcis* and *P.*  
332 *quercus*, respectively). The presence or absence of “AGCT” does not either exert a strong  
333 constraint on protein sequences, as the amino-acids encoded by “AGC” or “GTC” (Serine  
334 and Alanine, respectively) have many possible alternative codons and are easily replaceable  
335 residues given their mild physicochemical properties. Finally, we found no evidence that  
336 the removal of “AGCT” was due to a specific (for instance, enzyme-mediated) process  
337 targeting then replacing the forbidden 4-mer by a constant alternative word. Replacement  
338 patterns for 72 *P. dulcis* sites unambiguously mapped to their homologous *P. neocaledonia*



339 “AGCT” counterparts are indicated in supplementary Table S1. It suggests that the  
340 complete loss of “AGCT” in the A-clade strains is due to a stringent, nevertheless random  
341 (i.e. non-directed) evolutionary process.

342 The analysis of long nucleotide (and amino acid) sequences as overlapping k-mers  
343 has a long history in bioinformatics. Initially proposed in the context of the RNA folding  
344 problem<sup>23</sup>, the concept was then quickly applied to many other areas including gene  
345 parsing<sup>24</sup>, the detection of regulatory motifs<sup>24, 25</sup>, and has become central to the fast  
346 implementation of large-scale similarity search<sup>26, 27</sup>, sequence assembly<sup>28</sup>, and the binning  
347 of metagenomics data<sup>29, 30</sup>. However, its popularity should not hide that most of the  
348 observed frequency disparities (starting from the simplest mononucleotide composition)  
349 between k-mers within a given organism, or across species have not yet received  
350 convincing biological explanations<sup>31, 32</sup>. This suggests that profound and unexpected  
351 biological insights may one day come out from the analysis of k-mer frequencies, and in  
352 particular from their most improbable fluctuations. In a daring parallel with the delayed  
353 understanding of the CRISPR/CAS system from the initial spotting of intriguing repeats<sup>33</sup>,  
354 we would like to expect that the pandoraviridae “AGCT” distribution anomaly might lead  
355 to the discovery of a novel defense mechanism against viral infection.

356

## 357 **Materials and Methods**

### 358 **Pulse-field gel electrophoresis (PFGE)**

359 Approximately 5,000 pandoravirus particules were embedded in 1% low gelling agarose  
360 and the plugs were incubated in lysis buffer (50mM Tris-HCl pH8.0, 50mM EDTA, 1% (v/v)

361 N-laurylsarcosine, 1mM DTT and 1mg/mL proteinase K) for 16h at 50°C. After lysis, the  
362 plugs were washed once in sterile water and twice in TE buffer (10mM Tris-HCl pH8.0 and  
363 1mM EDTA) with 1mM PMSF, for 15 min at 50°C. The plugs were then equilibrated in the  
364 appropriate restriction buffer and digested with 20 units of PvuII or AluI at 37°C for 14  
365 hours. Digested plugs were washed once in sterile water for 15 min, once in lysis buffer for  
366 2h and three times in TE buffer. Electrophoresis was carried out in 0.5X TAE for 18 h at  
367 6V/cm, 120° included angle and 14°C constant temperature in a CHEF-MAPPER system (Bio-  
368 Rad) with pulsed times ramped from 0.2s to 120s.

### 369 **Availability of data**

370 All virus genome sequences analyzed in this work are freely available from the public  
371 GenBank repository (URL://[www.ncbi.nlm.nih.gov/genbank/](http://www.ncbi.nlm.nih.gov/genbank/)). The Pandoravirus  
372 sequences used here correspond to the following accession numbers: *P. dulcis*  
373 (NC\_021858), *P. neocaledonia* (NC\_037666), *P. macleodensis* (NC\_037665), *P. salinus*  
374 (NC\_022098), *P. quercus* (NC\_037667), *P. celtis* (NC\_ ), *P. inopinatum* (NC\_026440), *P.*  
375 *pampulha* (LT972219.1 ), *P. massiliensis* (LT972215.1), *P. braziliensis* (LT972217).

376

### 377 **References**

378 1. Philippe N, Legendre M, Doutre G, Couté Y, Poirot O, Lescot M, Arslan D, Seltzer V,  
379 Bertaux L, Bruley C, Garin J, Claverie JM, Abergel C. 2013. Pandoraviruses: amoeba viruses  
380 with genomes up to 2.5 Mb reaching that of parasitic eukaryotes. *Science* 341:281-286.

- 381 2. Legendre M, Fabre E, Poirot O, Jeudy S, Lartigue A, Alempic JM, Beucher L, Philippe N,  
382 Bertaux L, Christo-Foroux E, Labadie K, Couté Y, Abergel C, Claverie JM. 2018. Diversity and  
383 evolution of the emerging Pandoraviridae family. *Nat Commun* 9:2285.
- 384 3. Legendre M, Alempic JM, Philippe N, Lartigue A, Jeudy S, Poirot O, Ta NT, Nin S, Couté  
385 Y, Abergel C, Claverie JM. 2019. Pandoravirus celtis illustrates the microevolution processes  
386 at work in the giant Pandoraviridae genomes. *Front Microbiol* 10:430.
- 387 4. Abergel C, Legendre M, Claverie JM. 2015. The rapidly expanding universe of giant  
388 viruses: Mimivirus, Pandoravirus, Pithovirus and Mollivirus. *FEMS Microbiol Rev* 39:779-  
389 796.
- 390 5. Aherfi S, Andreani J, Baptiste E, Oumessoum A, Dornas FP, Andrade ACDSP, Chabriere E,  
391 Abrahao J, Levasseur A, Raoult D, La Scola B, Colson P. 2018. A large open pangenome and  
392 a small core genome for giant pandoraviruses. *Front Microbiol* 9:1486.
- 393 6) Jeffrey HJ. 1990. Chaos game representation of gene structure. *Nucleic Acids Res*  
394 18:2163-2170.
- 395 7) Hoang T, Yin C, Yau SS. 2016. Numerical encoding of DNA sequences by chaos game  
396 representation with application in similarity comparison. *Genomics* 108:134-142.
- 397 8) Mullan LJ, Bleasby AJ. 2002. Short EMBOSS User Guide. European Molecular Biology  
398 Open Software Suite. *Brief Bioinform.* 3:92-94.
- 399 9) Phillips GJ, Arnold J, Ivarie R. 1987. Mono- through hexanucleotide composition of the  
400 *Escherichia coli* genome: a Markov chain analysis. *Nucleic Acids Res* 15:2611-2626.

- 401 10) Altschul SF, Erickson BW. 1985. Significance of nucleotide sequence alignments: a  
402 method for random sequence permutation that preserves dinucleotide and codon usage.  
403 *Mol Biol Evol* 2:526-538.
- 404 11) Pagni M, Jongeneel CV. 2001. Making sense of score statistics for sequence  
405 alignments. *Brief Bioinform* 2:51-67.
- 406 12) Brister JR, Ako-Adjei D, Bao Y, Blinkova O. 2015. NCBI viral genomes resource.  
407 *Nucleic Acids Res* 43:D571-7.
- 408 13) Abbasifar R, Griffiths MW, Sabour PM, Ackermann HW, Vandersteegen K, Lavigne R,  
409 Noben JP, Alanis Villa A, Abbasifar A, Nash JH, Kropinski AM. 2014. Supersize me:  
410 *Cronobacter sakazakii* phage GAP32. *Virology* 460-461:138-146.
- 411 14) Kim MS, Hong SS, Park K, Myung H. 2013. Genomic analysis of bacteriophage  
412 PBECO4 infecting *Escherichia coli* O157:H7. *Arch Virol* 158:2399-2403.
- 413 15) Šimoliūnas E, Kaliniene L, Truncaite L, Klausas V, Zajančauskaite A, Meškys R. 2012.  
414 Genome of *Klebsiella* sp.-infecting bacteriophage vB\_KleM\_RaK2. *J Virol* 86:5406.
- 415 16) Pan YJ, Lin TL, Lin YT, Su PA, Chen CT, Hsieh PF, Hsu CR, Chen CC, Hsieh YC, Wang JT.  
416 2015. Identification of capsular types in carbapenem-resistant *Klebsiella pneumoniae*  
417 strains by *wzc* sequencing and implications for capsule depolymerase treatment.  
418 *Antimicrob Agents Chemother* 59:1038-1047.
- 419 17) Sharp PM. 1986. Molecular evolution of bacteriophages: evidence of selection  
420 against the recognition sites of host restriction enzymes. *Mol Biol Evol* 3:75-83.

- 421 18) Abergel C, Legendre M, Claverie JM. 2015. The rapidly expanding universe of giant  
422 viruses: Mimivirus, Pandoravirus, Pithovirus and Mollivirus. *FEMS Microbiol Rev* 39: 779-  
423 796.
- 424 19) Flusberg BA, Webster DR, Lee JH, Travers KJ, Olivares EC, Clark TA, Korlach J, Turner  
425 SW. 2010. Direct detection of DNA methylation during single-molecule, real-time  
426 sequencing. *Nat Methods* 7:461-465.
- 427 20) Agarkova IV, Dunigan DD, Van Etten JL. 2006. Virion-associated restriction  
428 endonucleases of chloroviruses. *J Virol* 80:8114-8123.
- 429 21) Odaert B, Saïda F, Aliprandi P, Durand S, Créchet JB, Guerois R, Laalami S, Uzan M,  
430 Bontems F. 2007. Structural and functional studies of RegB, a new member of a family of  
431 sequence-specific ribonucleases involved in mRNA inactivation on the ribosome. *J Biol*  
432 *Chem* 282:2019-2028.
- 433 22) Priet S, Lartigue A, Debart F, Claverie JM, Abergel C. 2015. mRNA maturation in giant  
434 viruses: variation on a theme. *Nucleic Acids Res* 43:3776-3788.
- 435 23) Dumas JP, Ninio J. 1982. Efficient algorithms for folding and comparing nucleic acid  
436 sequences. *Nucleic Acids Res* 10:197-206.
- 437 24) Claverie JM, Bougueleret L. 1986. Heuristic informational analysis of sequences.  
438 *Nucleic Acids Res* 14:179-196.
- 439 25) Brendel V, Beckmann JS, Trifonov EN. 1986. Linguistics of nucleotide sequences:  
440 morphology and comparison of vocabularies. *J Biomol Struct Dyn* 4:11-21.
- 441 26) Altschul SF, Gish W, Miller W, Myers EW, Lipman DJ. 1990. Basic local alignment search  
442 tool. *J Mol Biol* 215:403-410.
- 443 27) Kent WJ. 2002. BLAT--the BLAST-like alignment tool. *Genome Res.* 12:656-664.

- 444 28) Luo R, Liu B, Xie Y, Li Z, Huang W, Yuan J, He G, Chen Y, Pan Q, Liu Y, Tang J, Wu G,  
445 Zhang H, Shi Y, Liu Y, Yu C, Wang B, Lu Y, Han C, Cheung DW, Yiu SM, Peng S, Xiaoqian Z, Liu  
446 G, Liao X, Li Y, Yang H, Wang J, Lam TW, Wang J. 2012. SOAPdenovo2: an empirically  
447 improved memory-efficient short-read de novo assembler. *Gigascience* 1:18.
- 448 29) Chan CK, Hsu AL, Halgamuge SK, Tang SL. 2008. Binning sequences using very sparse  
449 labels within a metagenome. *BMC Bioinformatics* 9:215.
- 450 30) Teeling H, Meyerdierks A, Bauer M, Amann R, Glöckner FO. 2004. Application of  
451 tetranucleotide frequencies for the assignment of genomic fragments. *Environ Microbiol*  
452 6:938-947.
- 453 31) Karlin S, Mrázek J, Campbell AM. 1997. Compositional biases of bacterial genomes and  
454 evolutionary implications. *J Bacteriol* 179:3899-3913.
- 455 32) Bohlin J, Pettersson JH. 2019. Evolution of genomic base composition: from single cell  
456 microbes to multicellular animals. *Comput Struct Biotechnol J* 17:362-370.
- 457 33) Ishino Y, Krupovic M, Forterre P. 2018. History of CRISPR-Cas from encounter with a  
458 mysterious repeated sequence to Genome editing technology. *J Bacteriol* 200:pii: e00580-  
459 17.

460

## 461 **Figure Legends**

462 **Figure1.** Phylogenetic structure of the Pandoraviridae. Adapted from [ref. 3]. The number  
463 of occurrences of the “AGCT” 4-mer is indicated for the genome of each strain. The counts  
464 are given for one DNA strand and are identical for both strands (“AGCT” is palindromic).

465

466 **Figure 2.** Influence of random sequence length on the number of missing 4-mers. 10.000  
467 random sequences up to 10.000 bp in size were analyzed. Except for extremely rare  
468 fluctuations, no sequence longer than 4000 bp exhibits a missing 4-mer. 4-mer overlaps as  
469 well as nucleotide compositions are taken into account in this analysis.

470

471 **Figure 3.** Distribution of 4-mer frequencies in natural and randomized genome sequences.  
472 Top: histogram of the number of distinct 4-mers occurring at various numbers of  
473 occurrences in the *P. dulcis* genome; Bottom: same analysis after randomization.

474

475 **Figure 4.** Missing 4-mers in the largest viral genomes. Except for *P. dulcis* and *P. quercus*,  
476 the largest viral genomes missing a 4-mers are those of 5 distinct bacteriophages  
477 (accession numbers: NC\_019401, NC\_025447, NC\_027364, NC\_027399, NC\_019526).

478

479 **Figure 5.** Cumulative distribution of “AGCT” occurrences along the different pandoravirus  
480 genomes. The “AGCT” word appears uniformly spread throughout the B-clade  
481 pandoravirus genomes, except for a clear rarefaction at the end of the *P. neocaledonia*  
482 genome sequence.

483

484 **Figure 6.** DNA sequence dot-plot comparison of *P. neocaledonia* (horizontal) and *P.*  
485 *salinus* (vertical). The two genomes only exhibit remnants of collinearity except for the  
486 terminal region of *P. neocaledonia* (red circle) coinciding with a low “AGCT” density

487 typical of A-clade strains (Fig. 5). Dot plot generated using GEPARD with parameters:  
488 word size=15, window size=0 (Krumisiek et al., *Bioinformatics* **23**, 1026-1028 (2007)).

489

490 **Figure 7.** Comparison of the proportion of all 4-mers in *P. dulcis* (A-clade) vs. *P.*  
491 *neocaledonia* (B-clade). The 4 most frequent 4-mers are “GCGC”, “CGCG”, “CGCC”, and  
492 “GGCG”.

493

494 **Supplementary Figure S1.** Digestion of *P. neocaledonia* DNA at “AGCT” sites. Lane 1:  
495 undigested *P. neocaledonia* DNA (2.2 Mb) migrating as expected. The bottom band  
496 (below 48.5 kb) correspond to an episome not always present. Lane 2: *P. neocaledonia*  
497 DNA digested by the PvuII restriction enzyme (cutting site: cAGCTg). Lane 3: *P.*  
498 *neocaledonia* DNA digested by the AluI restriction enzyme (cutting site: AGCT). These  
499 results demonstrate that the “AGCT” sites are not protected by modified nucleotides.

500

## 501 **Acknowledgements**

502 We thank Dr. Sacha Schutz for his inspiring blog (URL: <http://dridk.me/>) that initiated our  
503 interest in the Chaos Game Representation technique. We thank Dr. Matthieu Legendre  
504 for verifying the absence of modified nucleotides at “AGCT” sites using the PACBIO  
505 sequence data. Our laboratory is supported by the French National Research Agency  
506 (ANR-14-CE14-0023-01), France Genomique (ANR-10-INSB-01-01), Institut Français de  
507 Bioinformatique (ANR-11-INSB-0013), the Fondation Bettencourt-Schueller (OTP51251),  
508 and by the Provence-Alpes-Côte-d’Azur region (2010 12125). We acknowledge the



509 support of the PACA-Bioinfo platform. The funding bodies had no role in the design of the  
510 study, analysis, and interpretation of data and in writing the manuscript.

511

## 512 **Competing interests**

513 The authors declare that they have no competing interests

514

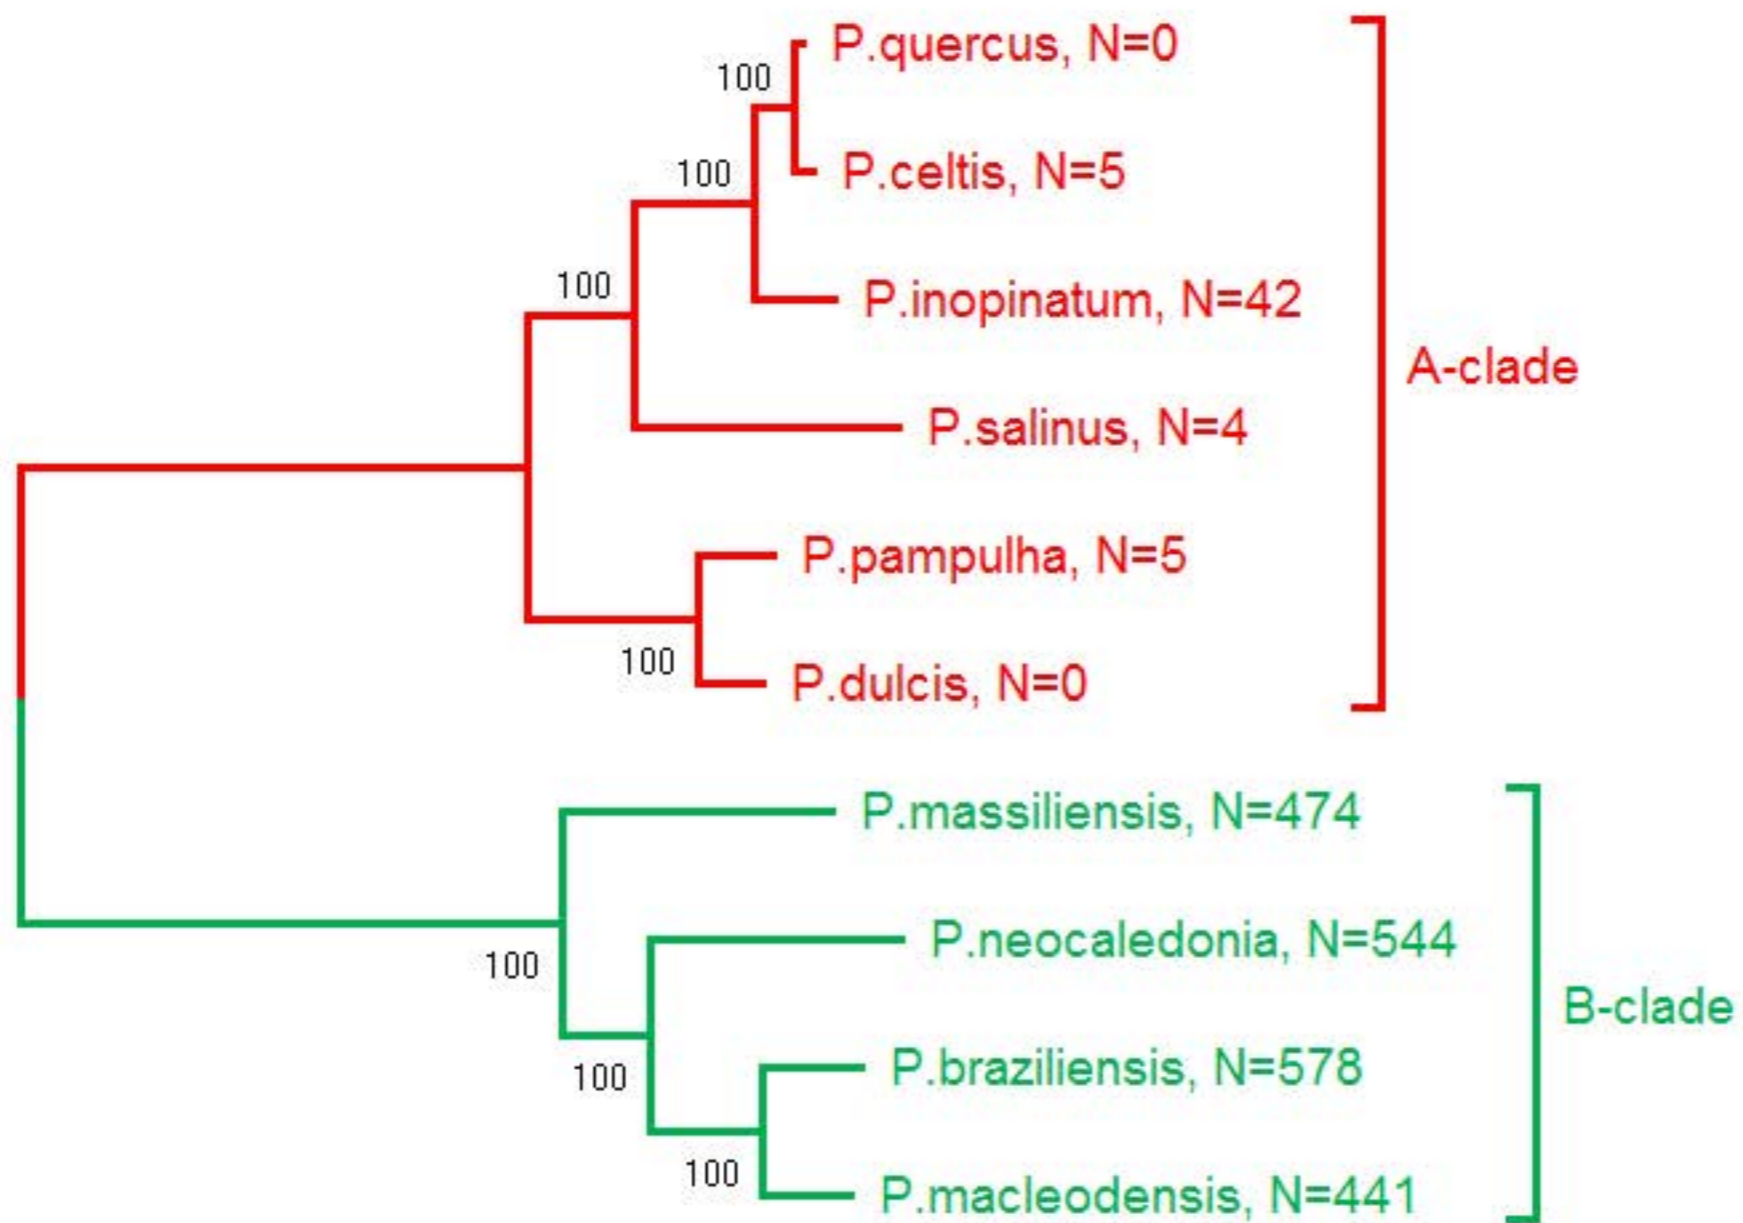

1

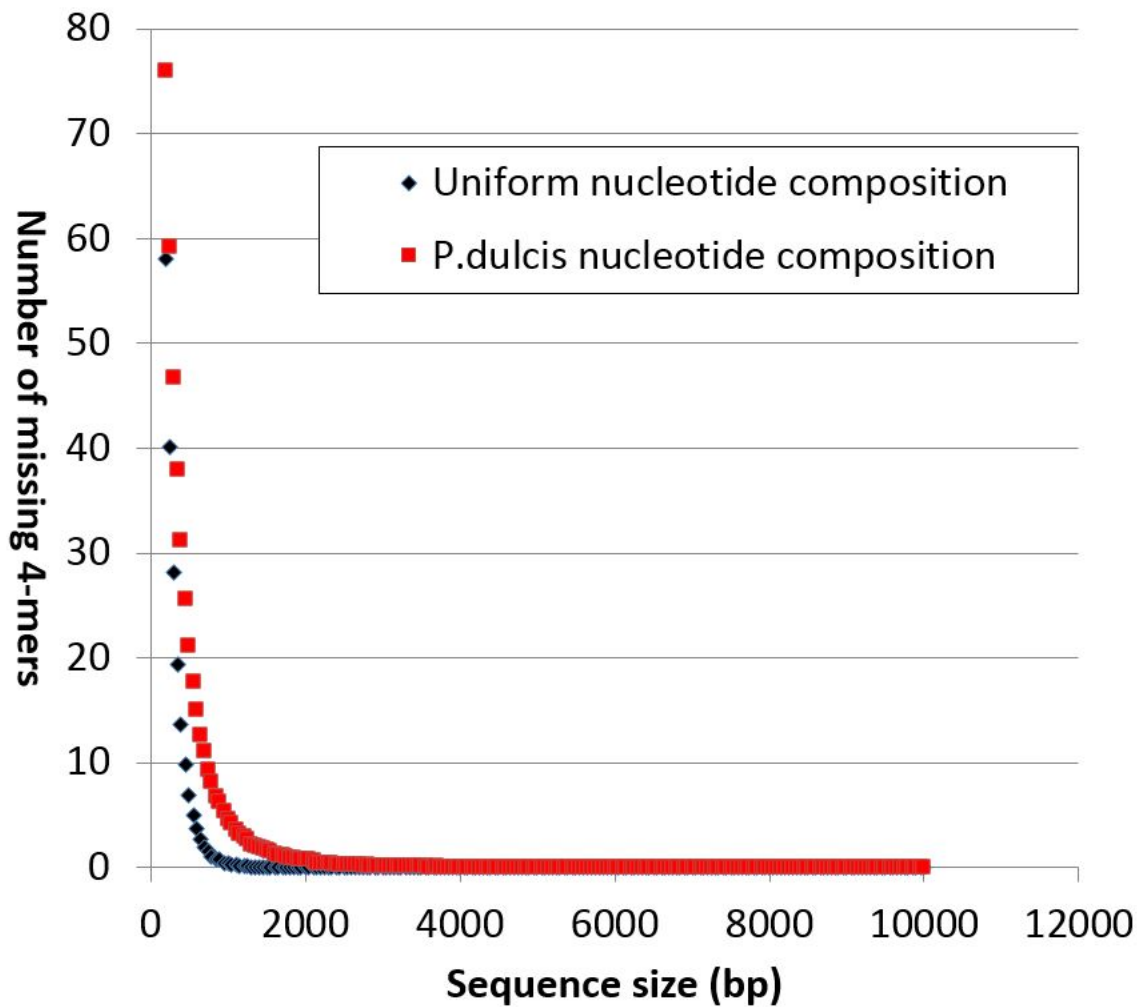

### Pandoravirus dulcis, word size=4

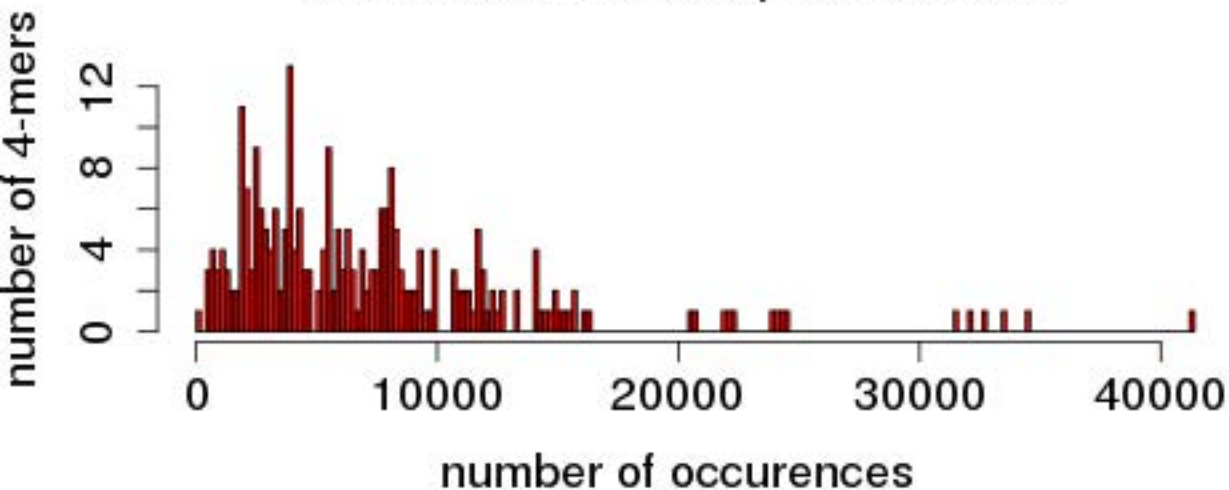

### Pandoravirus dulcis shuffled, word size=4

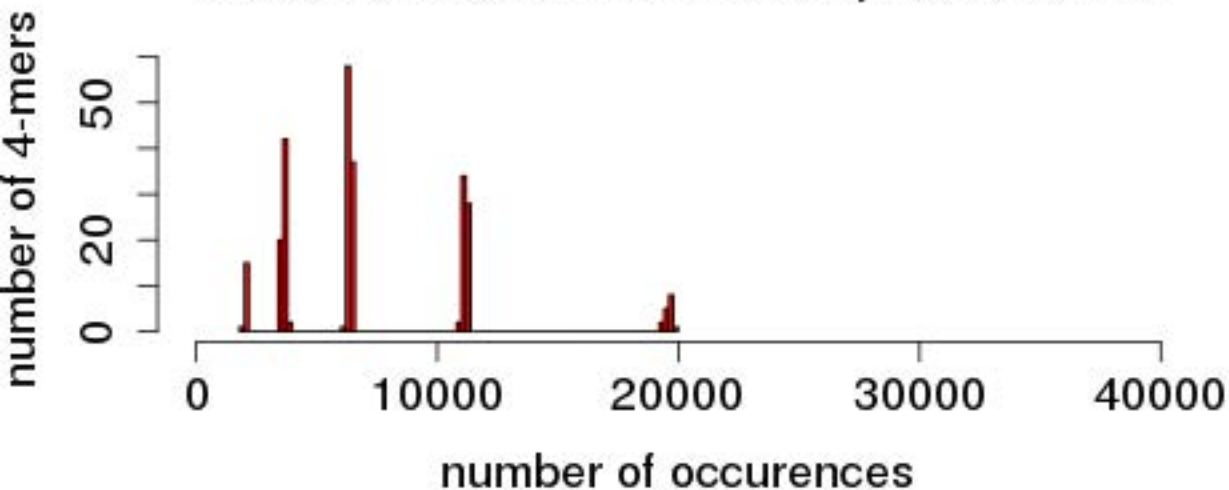

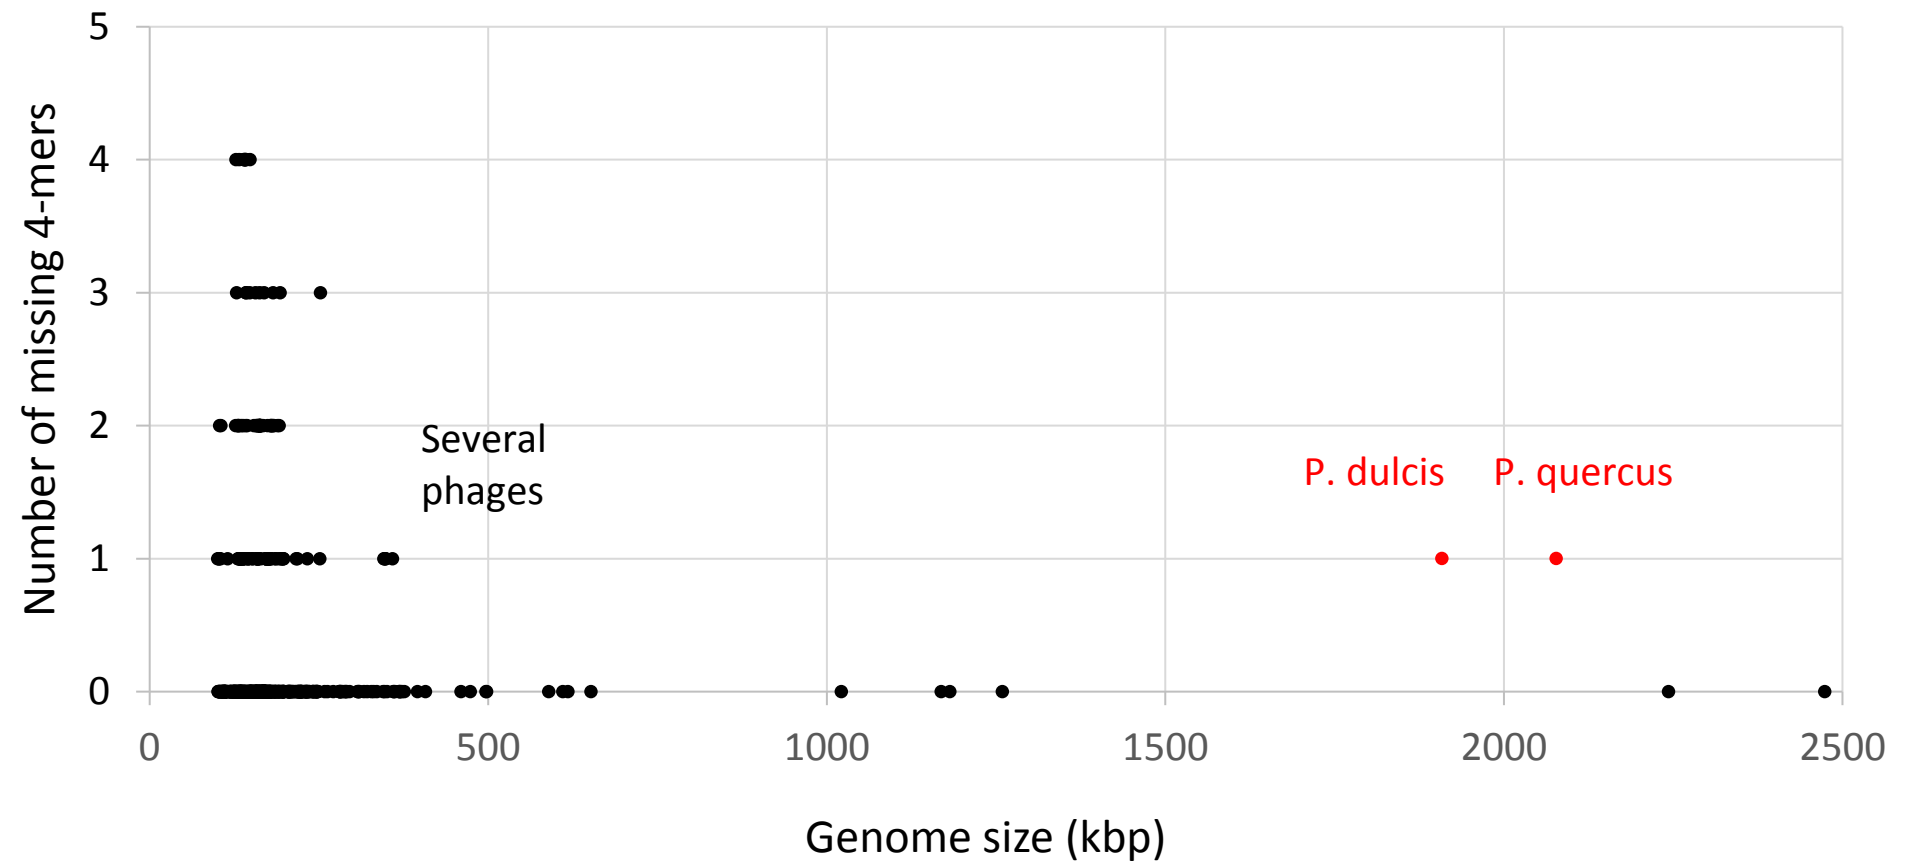

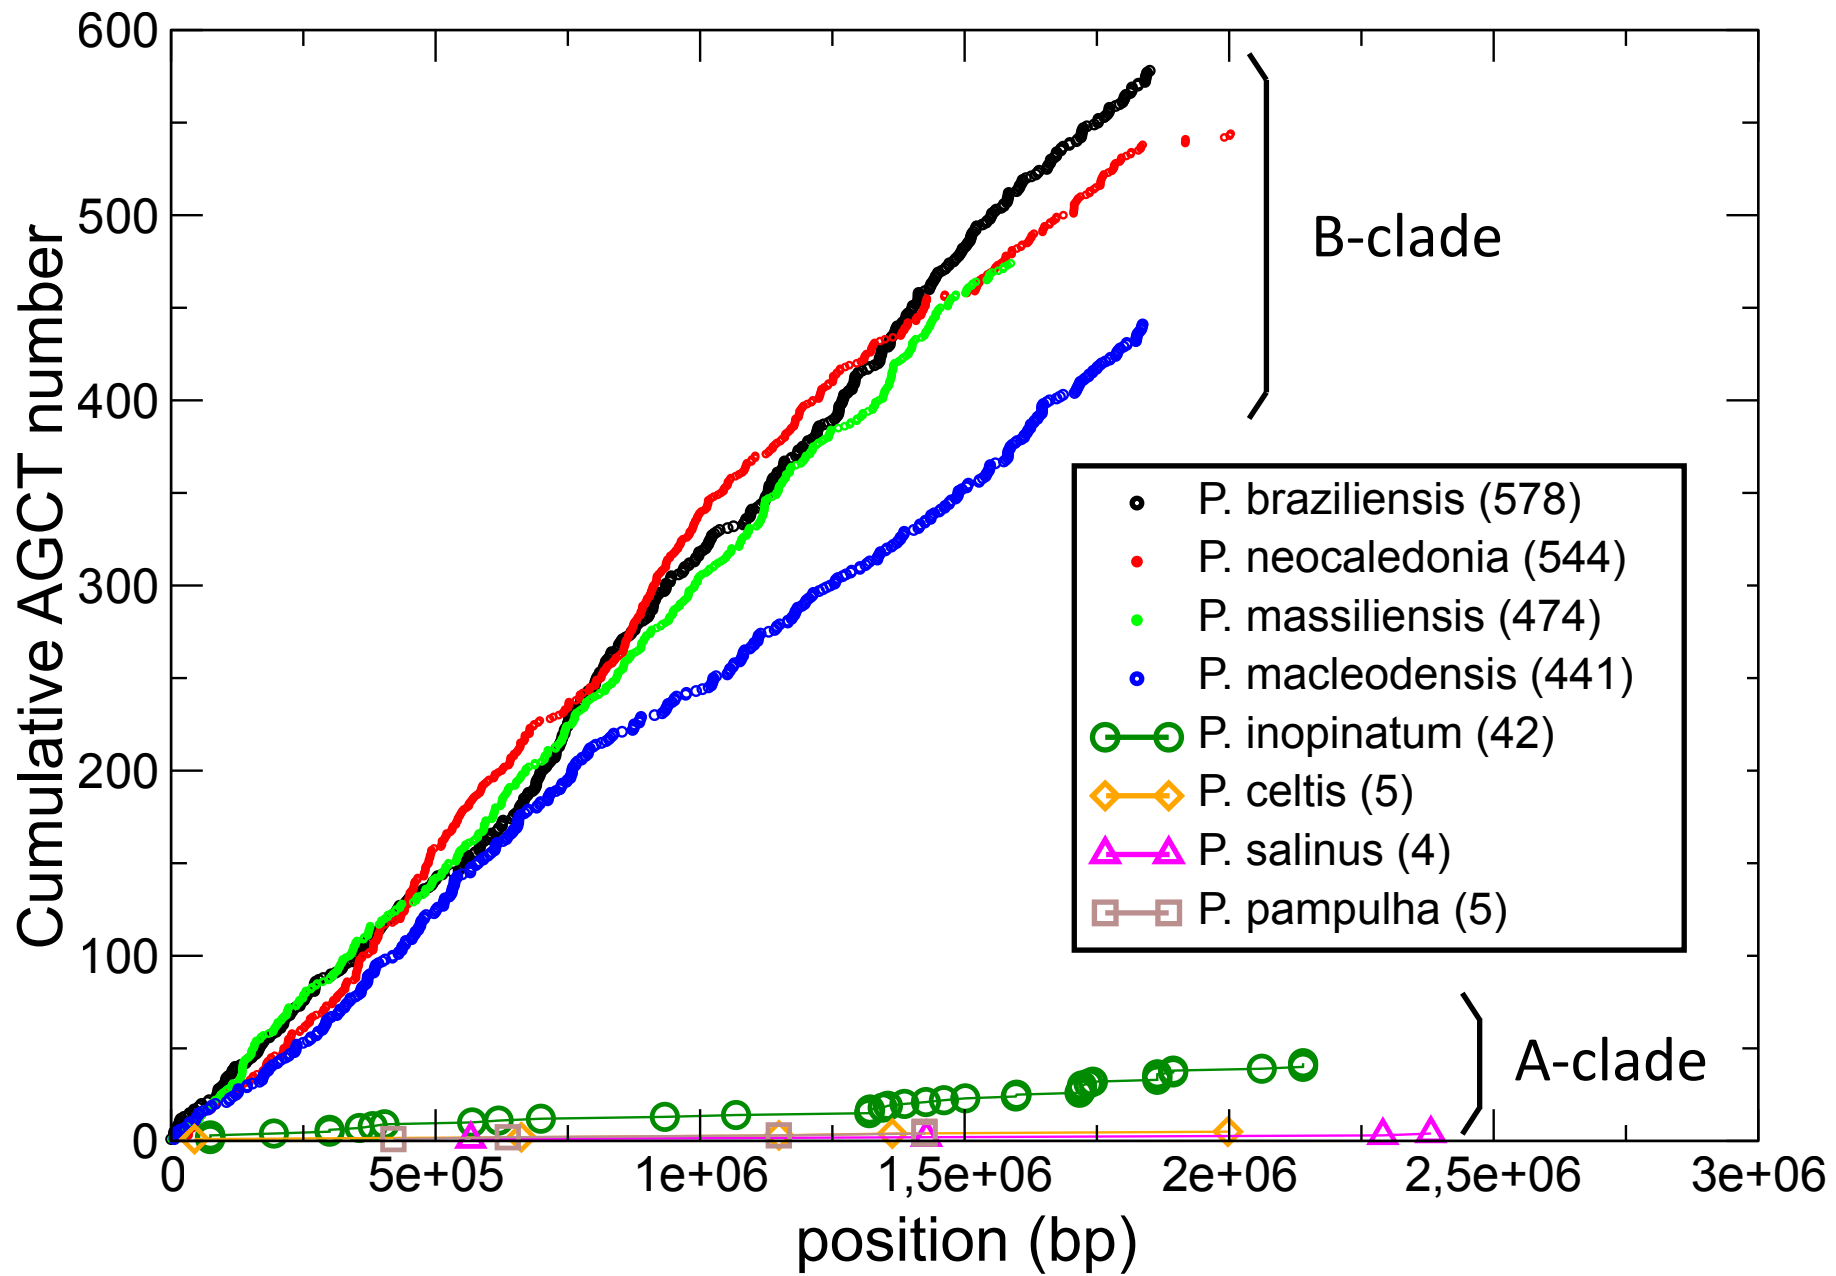

*P. neocaledonia*

2003190

0

*P. salinus*

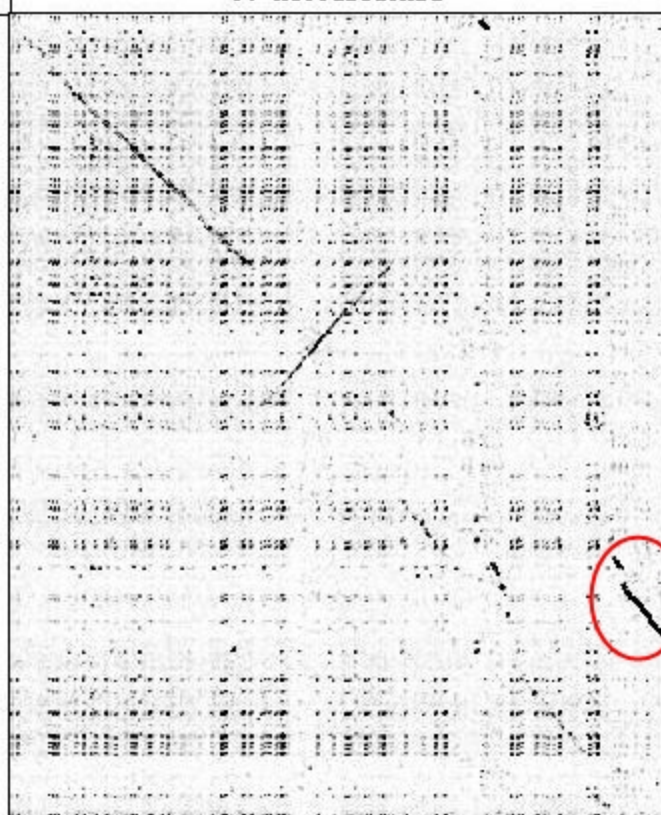

2473869

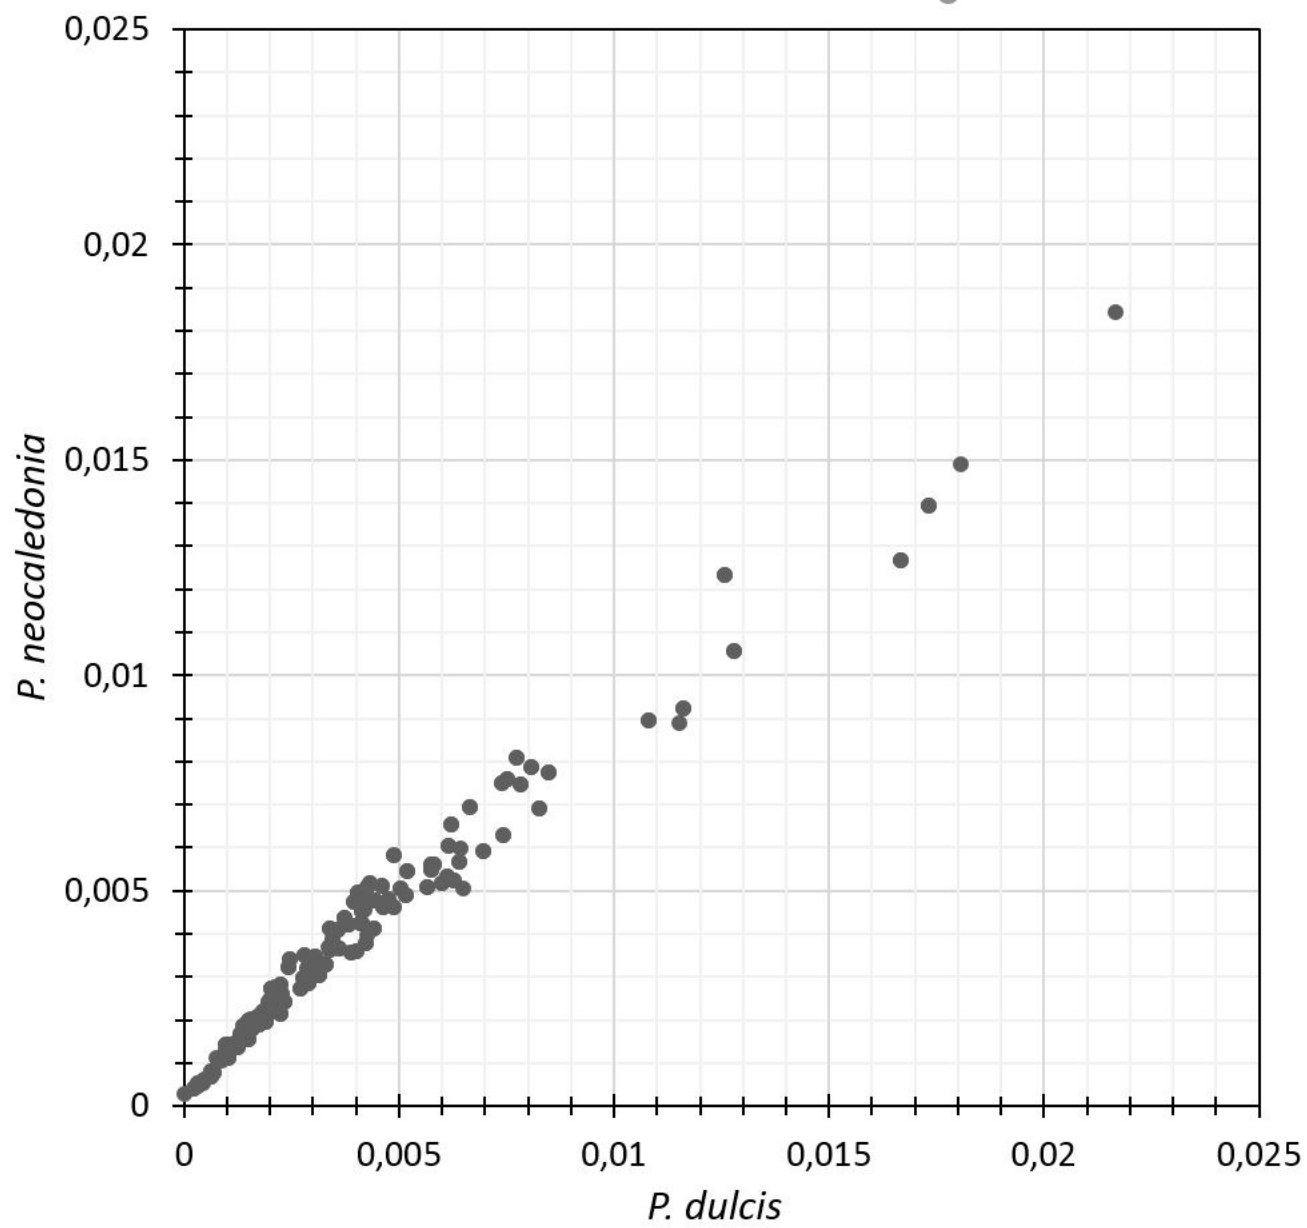



**Table 1.** Distribution of the AGC (and the complementary GCT) 3-mers

| Statistics                                         | P. dulcis                     |                  |                  | P. quercus                    |                  |                  |
|----------------------------------------------------|-------------------------------|------------------|------------------|-------------------------------|------------------|------------------|
| Genome size (bp)                                   | 1,908,524                     |                  |                  | 2,077,288                     |                  |                  |
|                                                    | interORF                      | ORF              | global           | interORF                      | ORF              | global           |
| AGC frequency (strand 1)                           | 0.0101<br>(1/99)              | 0.0112<br>(1/89) | 0.0109<br>(1/92) | 0.0098<br>(1/102)             | 0.0110<br>(1/90) | 0.0106<br>(1/94) |
| GCT frequency (strand 1)                           | 0.0102<br>(1/98)              | 0.0156<br>(1/64) | 0.0138<br>(1/72) | 0.0097<br>(1/103)             | 0.0145<br>(1/68) | 0.0129<br>(1/77) |
| AGC/GCT (2 strands, global)                        | 0.0123 (1/81)                 |                  |                  | 0.0118 (1/85)                 |                  |                  |
| AGC/GCT overall rank                               | 37/64                         |                  |                  | 43/64                         |                  |                  |
| p(AGC).p(T)                                        | 2.24 10 <sup>-3</sup> (1/446) |                  |                  | 2.31 10 <sup>-3</sup> (1/432) |                  |                  |
| AGCT expected number<br>(one strand x p(AGC).p(T)) | 4286                          |                  |                  | 4898                          |                  |                  |
| AGCT observed number                               | 0                             |                  |                  | 0                             |                  |                  |
| ACGT expected number<br>(one strand x p(ACG).p(T)) | 7884                          |                  |                  | 8387                          |                  |                  |
| ACGT observed number                               | 5822                          |                  |                  | 6165                          |                  |                  |
